# Supplementary material for: High Prevalence of Multidrug-Resistant Clostridioides difficile Following Extensive Use of Antimicrobials in Hospitalized Patients in Kenya
Source: PubMed Central journal article supplement (PMC7897694; doi:10.3389/fcimb.2020.604986), 2021-02-08
Supplement: Table_1.pdf [file Table_1.pdf]

**Table S1. Antimicrobial use in patients (>2 years old) with and without *C. difficile***

| <b>Parameters</b>           | <b><i>C. difficile</i><br/>positive (n=57)</b> | <b><i>C. difficile</i><br/>negative (n=175)</b> | <b>Total<br/>(n=232)</b> | <b>P-<br/>value</b> |
|-----------------------------|------------------------------------------------|-------------------------------------------------|--------------------------|---------------------|
| Antimicrobial exposure      | 56 (98.2)                                      | 141 (80.5)                                      | 197 (84.9)               | <0.001 <sup>#</sup> |
| <b>Antimicrobial</b>        |                                                |                                                 |                          |                     |
| <b>Penicillins</b>          |                                                |                                                 |                          |                     |
| Amoxicillin/clavulanic acid | 24 (42.1)                                      | 45 (25.7)                                       | 69 (29.7)                | 0.029 <sup>#</sup>  |
| Penicillins                 | 8 (14.0)                                       | 7 (4.0)                                         | 15 (6.6)                 | 0.013 <sup>#</sup>  |
| Flucloxacillin              | 3 (5.3)                                        | 6 (3.4)                                         | 9 (3.9)                  | 0.693               |
| <b>Cephalosporins</b>       |                                                |                                                 |                          |                     |
| Ceftazidime                 | 4 (7.0)                                        | 7 (4.0)                                         | 11 (4.7)                 | 0.471               |
| Cefuroxime                  | 1 (1.8)                                        | 5 (2.9)                                         | 6 (2.6)                  | 1.000               |
| Ceftriaxone                 | 40 (70.2)                                      | 81 (46.3)                                       | 121 (52.2)               | 0.002 <sup>#</sup>  |
| <b>Carbapenem</b>           |                                                |                                                 |                          |                     |
| Meropenem                   | 12 (21.1)                                      | 15 (8.6)                                        | 27 (11.6)                | 0.016 <sup>#</sup>  |
| <b>Aminoglycosides</b>      |                                                |                                                 |                          |                     |
| Gentamicin                  | 8 (14.0)                                       | 12 (6.9)                                        | 20 (8.6)                 | 0.106               |
| Amikacin                    | 7 (12.3)                                       | 5 (2.9)                                         | 12 (5.2)                 | 0.011 <sup>#</sup>  |
| <b>Macrolides</b>           |                                                |                                                 |                          |                     |
| Azithromycin                | 2 (3.5)                                        | 1 (0.6)                                         | 3 (1.3)                  | 0.150               |
| Clarithromycin              | 7 (12.3)                                       | 4 (2.3)                                         | 11 (4.7)                 | 0.006 <sup>#</sup>  |
| Erythromycin                | 1 (1.4)                                        | 2 (1.1)                                         | 3 (1.3)                  | 0.573               |
| <b>Fluoroquinolones</b>     |                                                |                                                 |                          |                     |
| Ciprofloxacin               | 15 (26.3)                                      | 17 (9.7)                                        | 32 (13.8)                | 0.003 <sup>#</sup>  |
| <b>Glycopeptides</b>        |                                                |                                                 |                          |                     |
| Vancomycin                  | 5 (8.8)                                        | 7 (4.0)                                         | 12 (5.2)                 | 0.174               |
| <b>Tetracycline</b>         |                                                |                                                 |                          |                     |
| Tetracycline                | 1 (1.8)                                        | 0 (0)                                           | 1 (0.4)                  | 0.246               |
| Doxycycline                 | 0 (0)                                          | 1 (0.6)                                         | 1 (0.4)                  | 1.000               |
| <b>Sulfonamides</b>         |                                                |                                                 |                          |                     |
| Cotrimoxazole               | 15 (26.3)                                      | 22 (12.6)                                       | 37 (16.0)                | 0.021 <sup>#</sup>  |
| <b>Nitroimidazole</b>       |                                                |                                                 |                          |                     |

|                                   |           |           |           |                    |
|-----------------------------------|-----------|-----------|-----------|--------------------|
| Metronidazole                     | 20 (35.1) | 53 (30.3) | 73 (31.5) | 0.514              |
| <b>Oxazolidinone</b>              |           |           |           |                    |
| Linezolid                         | 2 (3.5)   | 1 (0.6)   | 3 (1.3)   | 0.150              |
| <b>Lincosamide</b>                |           |           |           |                    |
| Clindamycin                       | 9 (15.8)  | 6 (3.4)   | 15 (6.6)  | 0.003 <sup>#</sup> |
| <b>Anti-TB medication*</b>        | 14 (24.6) | 18 (10.3) | 32 (13.8) | 0.013 <sup>#</sup> |
| <b>No. of antimicrobials used</b> |           |           |           |                    |
| One                               | 4 (7.0)   | 40 (22.9) | 44 (19.0) | 0.006 <sup>#</sup> |
| Two                               | 10 (17.5) | 55 (31.4) | 65 (28.0) | 0.043 <sup>#</sup> |
| Three                             | 15 (26.3) | 21 (12.0) | 36 (15.5) | 0.019 <sup>#</sup> |
| ≥ Four                            | 27 (47.4) | 23 (13.1) | 50 (21.6) | 0.000 <sup>#</sup> |
| <b>Duration of antimicrobials</b> |           |           |           |                    |
| ≤ 1 week                          | 7 (12.3)  | 29 (16.6) | 36 (15.5) | 0.531              |
| 2 weeks                           | 11 (19.3) | 38 (21.7) | 49 (21.1) | 0.852              |
| 3 weeks                           | 10 (17.5) | 17 (9.7)  | 27 (11.6) | 0.151              |
| ≥ 4 weeks                         | 28 (49.1) | 57 (32.6) | 85 (36.6) | 0.027 <sup>#</sup> |

\* Anti-TB medication included rifampicin, isoniazid, ethambutol, and pyrazinamide; # Significant P-values ≤0.05
